# Supplementary material
Source: PubMed Central journal article supplement (PMC395906)

A SOD activity gel

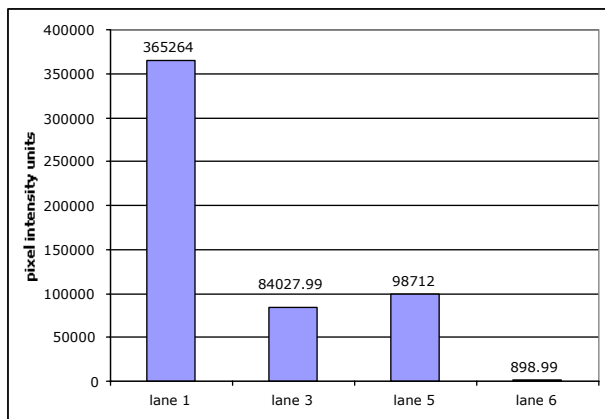

B SOD activity gel

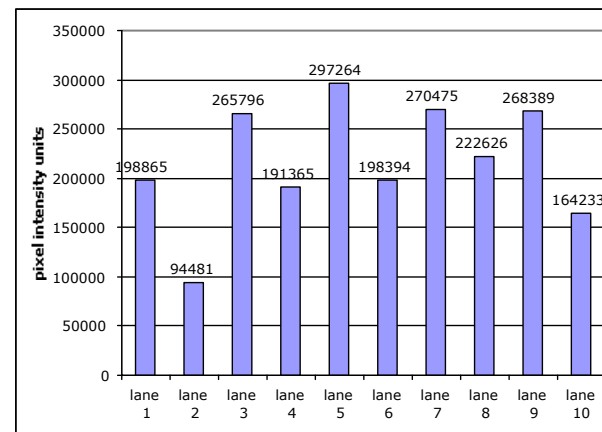

A SOD1 immunoblot

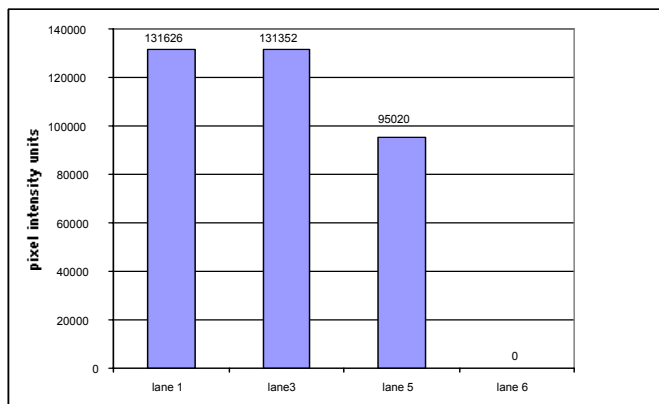

B SOD1 immunoblot

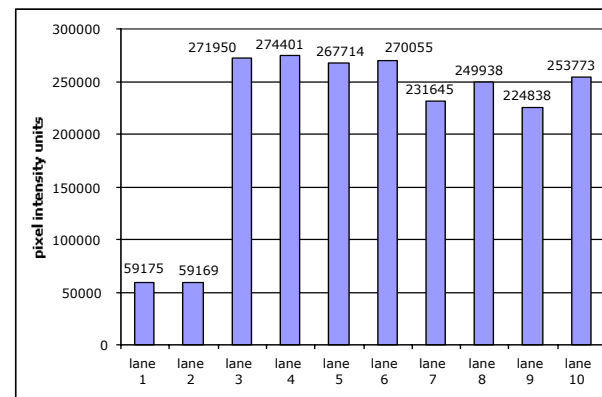

**Fig. 2 Densitometry**

2A SOD activity gel

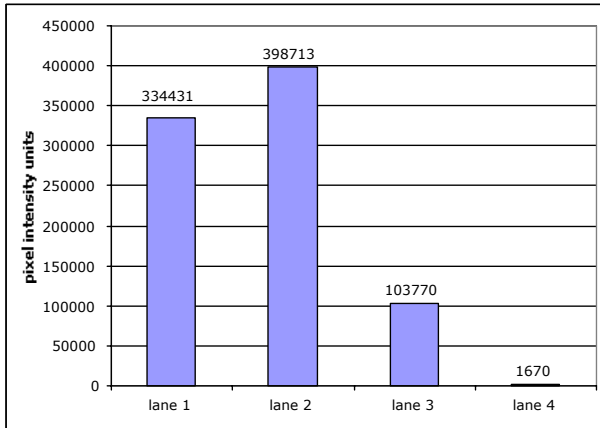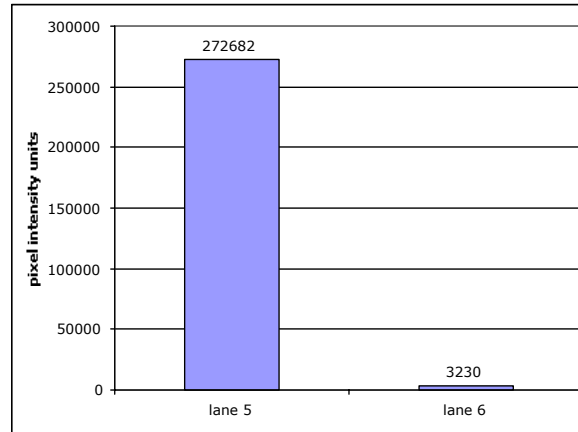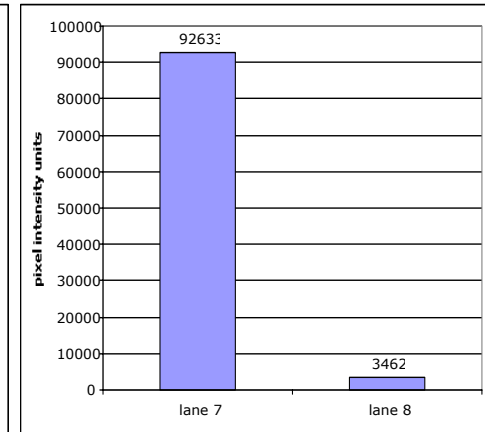

2A SOD1 immunoblot

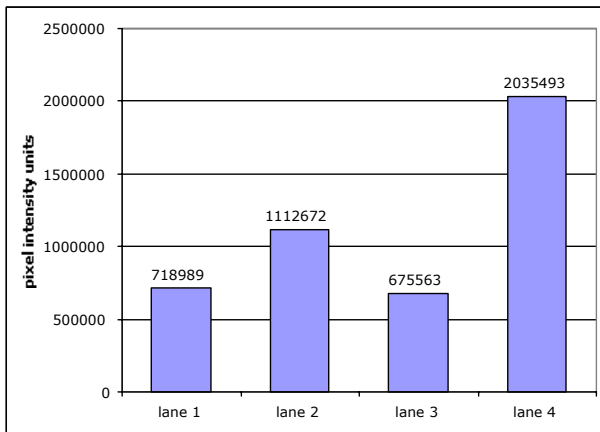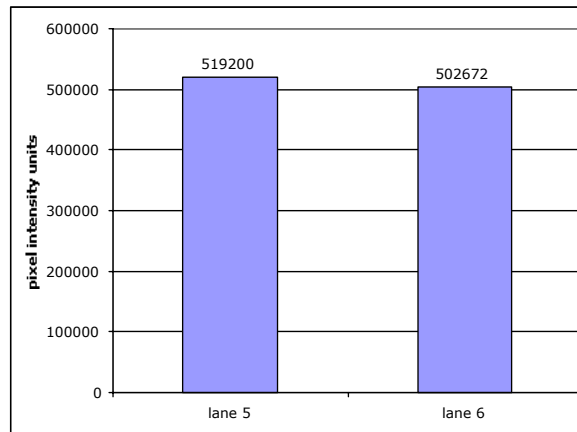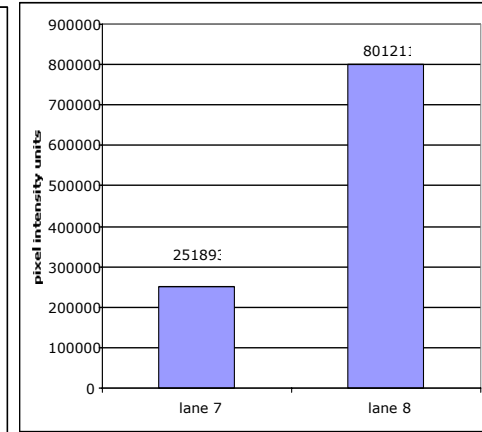

**Fig. 3 Densitometry**

SOD Activity gel

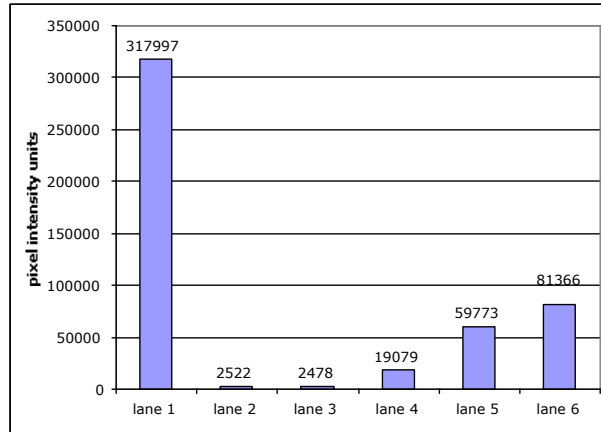

SOD1 immunoblot

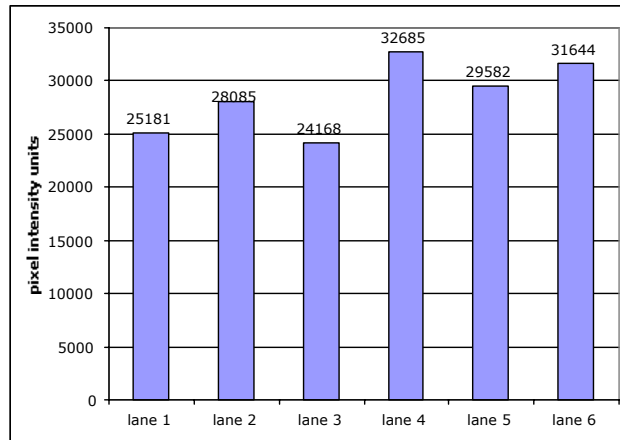

**Fig. 4 Densitometry**

SOD activity gel

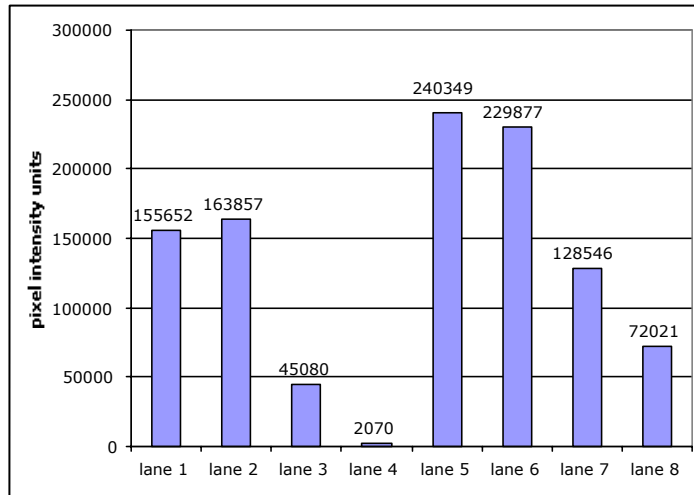

SOD1 immunoblot

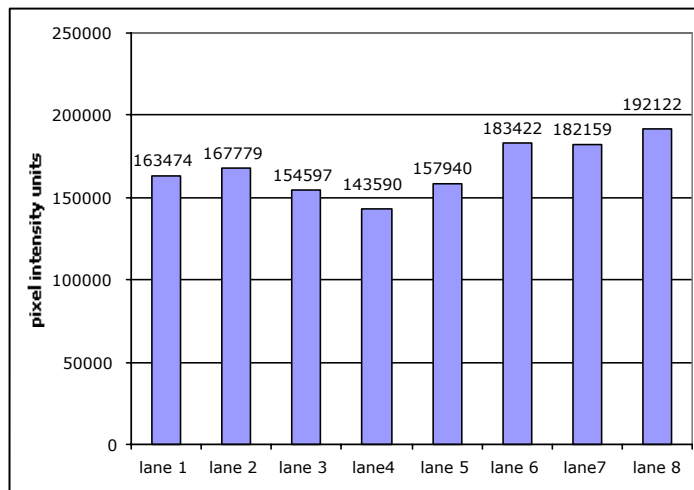

**Fig. 5 Densitometry**

5B SOD activity gel

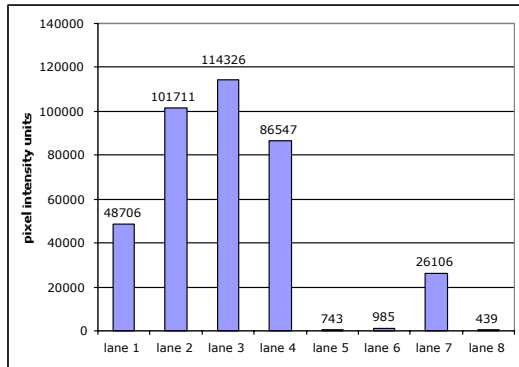

5C SOD activity gel

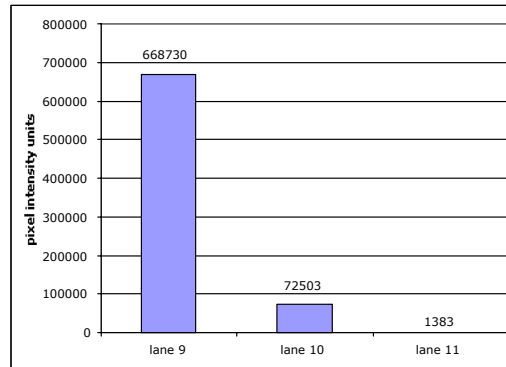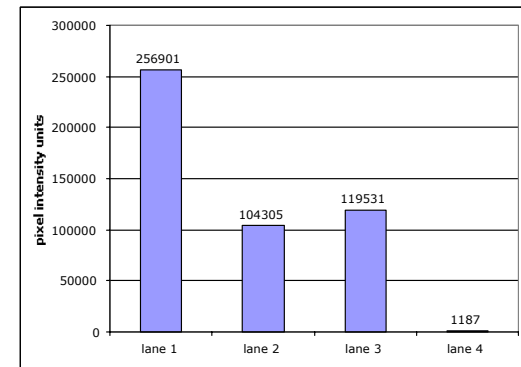

5B SOD1 immunoblot

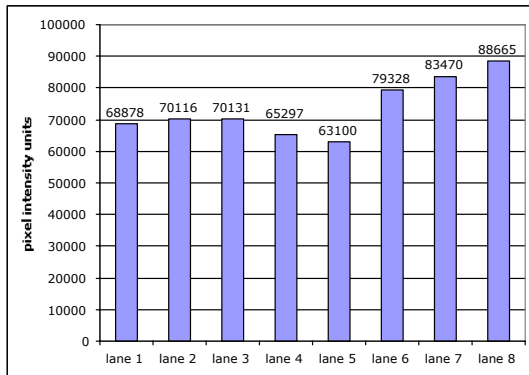

5C SOD1 immunoblot

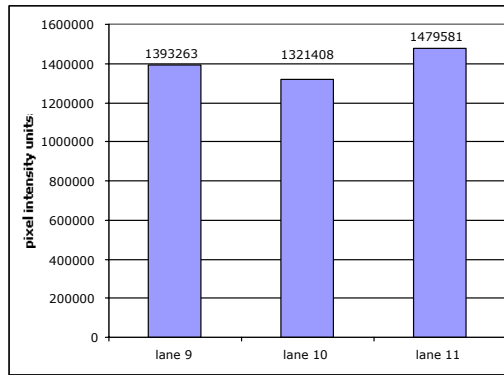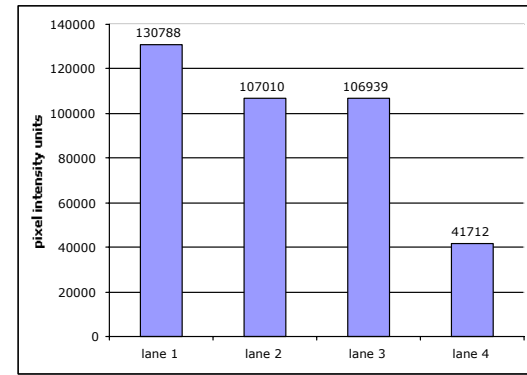

Supplement: pnas_101_16_5964__1.pdf [file pnas_101_16_5964__1.pdf]
